# Supplementary material for: Comparison of simulation debriefs with traditional needs assessment methods: a qualitative exploratory study in a critical care community setting
Source: PubMed Central journal article supplement — BMJ Open. 2018 Oct 8;8(10):e020570. doi: 10.1136/bmjopen-2017-020570 (PMC6194405; doi:10.1136/bmjopen-2017-020570), 2018-10-08
Supplement: bmjopen-2017-020570supp001.pdf [file bmjopen-2017-020570supp001.pdf]

**Online Supplement A: Qualitative data display comparing the frequency of themes across the various data collection tools**

|                                   | <b>Data Collection Tools</b>                                |                              |                                  |                            |
|-----------------------------------|-------------------------------------------------------------|------------------------------|----------------------------------|----------------------------|
| <b>Themes</b>                     | <b>Earlier NA<br/>(interviews<br/>and focus<br/>groups)</b> | <b>Debrief<br/>after HFS</b> | <b>Debrief<br/>after<br/>VPS</b> | <b>Total<br/>HFS + VPS</b> |
| <b>Community Hospital</b>         |                                                             |                              |                                  |                            |
| Knowledge, Skills and Abilities   | 104                                                         | 53                           | 74                               | 127                        |
| Roles                             | 100                                                         | 36                           | 83                               | 119                        |
| Communication                     | 92                                                          | 13                           | 21                               | 34                         |
| Patient Flow                      | 95                                                          | 2                            | 35                               | 37                         |
| Resources - Human                 | 80                                                          | 32                           | 32                               | 64                         |
| Resources - Physical              | 44                                                          | 13                           | 24                               | 37                         |
| Confidence/Comfort                | 49                                                          | 25                           | 16                               | 41                         |
| Team                              | 35                                                          | 26                           | 16                               | 42                         |
| Palliative/EOLC                   | 27                                                          | 0                            | 0                                | 0                          |
| Leadership                        | 23                                                          | 6                            | 4                                | 10                         |
| <b>Inter-hospital Interaction</b> |                                                             |                              |                                  |                            |
| Transfer                          | 200                                                         | 3                            | 21                               | 24                         |
| Communication                     | 192                                                         | 13                           | 21                               | 34                         |
| Patients post referral hospital   | 49                                                          | 0                            | 0                                | 0                          |
| Relationship                      | 51                                                          | 10                           | 7                                | 17                         |
| Lack of understanding             | 47                                                          | 0                            | 0                                | 0                          |
| <b>Additional Themes</b>          |                                                             |                              |                                  |                            |
| Solutions                         | 193                                                         | 28                           | 29                               | 57                         |
| Education/Training                | 182                                                         | 13                           | 10                               | 23                         |
| Vision                            | 40                                                          | 0                            | 0                                | 0                          |
| Family and patient thoughts       | 31                                                          | 0                            | 0                                | 0                          |
| Night/Weekend                     | 48                                                          | 5                            | 22                               | 27                         |
