# Supplementary material for: Comparison of simulation debriefs with traditional needs assessment methods: a qualitative exploratory study in a critical care community setting
Source: PubMed Central journal article supplement — BMJ Open. 2018 Oct 8;8(10):e020570. doi: 10.1136/bmjopen-2017-020570 (PMC6194405; doi:10.1136/bmjopen-2017-020570), 2018-10-08
Supplement: bmjopen-2017-020570supp002.pdf [file bmjopen-2017-020570supp002.pdf]

**Online supplement B: Qualitative data display comparing the frequency of themes simulation specific themes**

|                 | <b>Data Collection Tools</b> |                          |                        |
|-----------------|------------------------------|--------------------------|------------------------|
| <b>Themes</b>   | <b>Debrief after HFS</b>     | <b>Debrief after VPS</b> | <b>Total HFS + VPS</b> |
| Fidelity        |                              |                          |                        |
| - Environment   | 27                           | 5                        | 32                     |
| - Equipment     | 15                           | 1                        | 16                     |
| - Psychological | 4                            | 1                        | 5                      |
| Teaching        | 46                           | 29                       | 75                     |
| Reflection      | 50                           | 75                       | 125                    |
| Interruption    | 8                            | 0                        | 8                      |
| Learning Style  | 4                            | 1                        | 5                      |
